# Supplementary material
Source: publisher site journal article supplement (https://www.dovepress.com/article/293993)
Supplement: Supplementary file 1 [file get_supplementary_file.php]

**Supplementary materials**

**Figure S1**


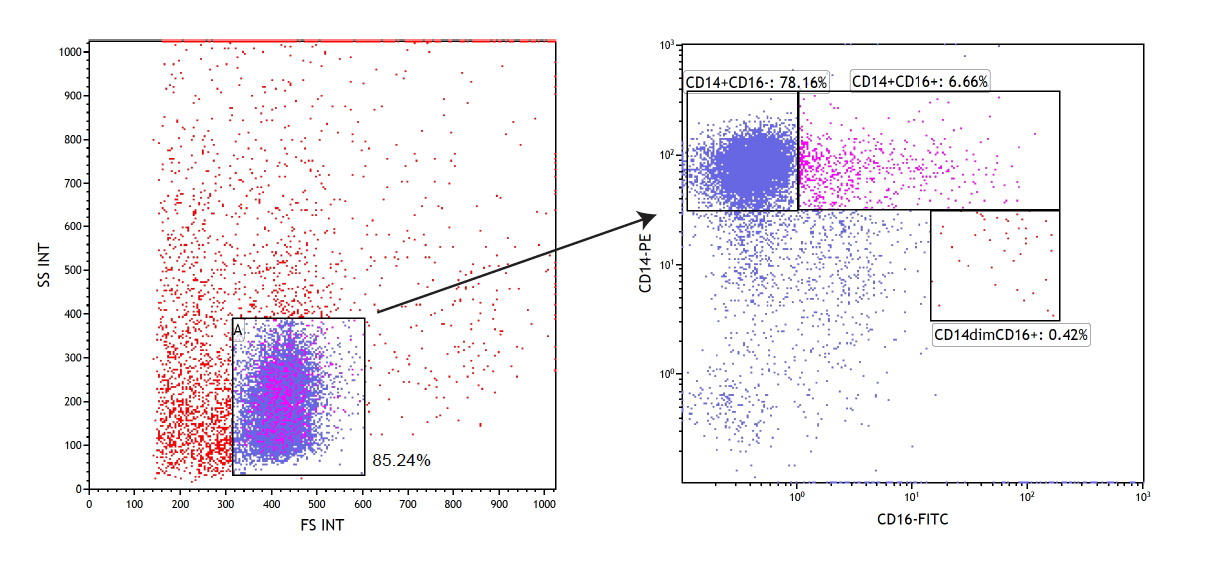


Fig. S1 Purity of monocytes identified by flow cytometry. All monocytes accounted for 85.24%, in which CM accounted for 78.16%, IM and NCM accounted for about 7.08%.

**Figure S2**

**
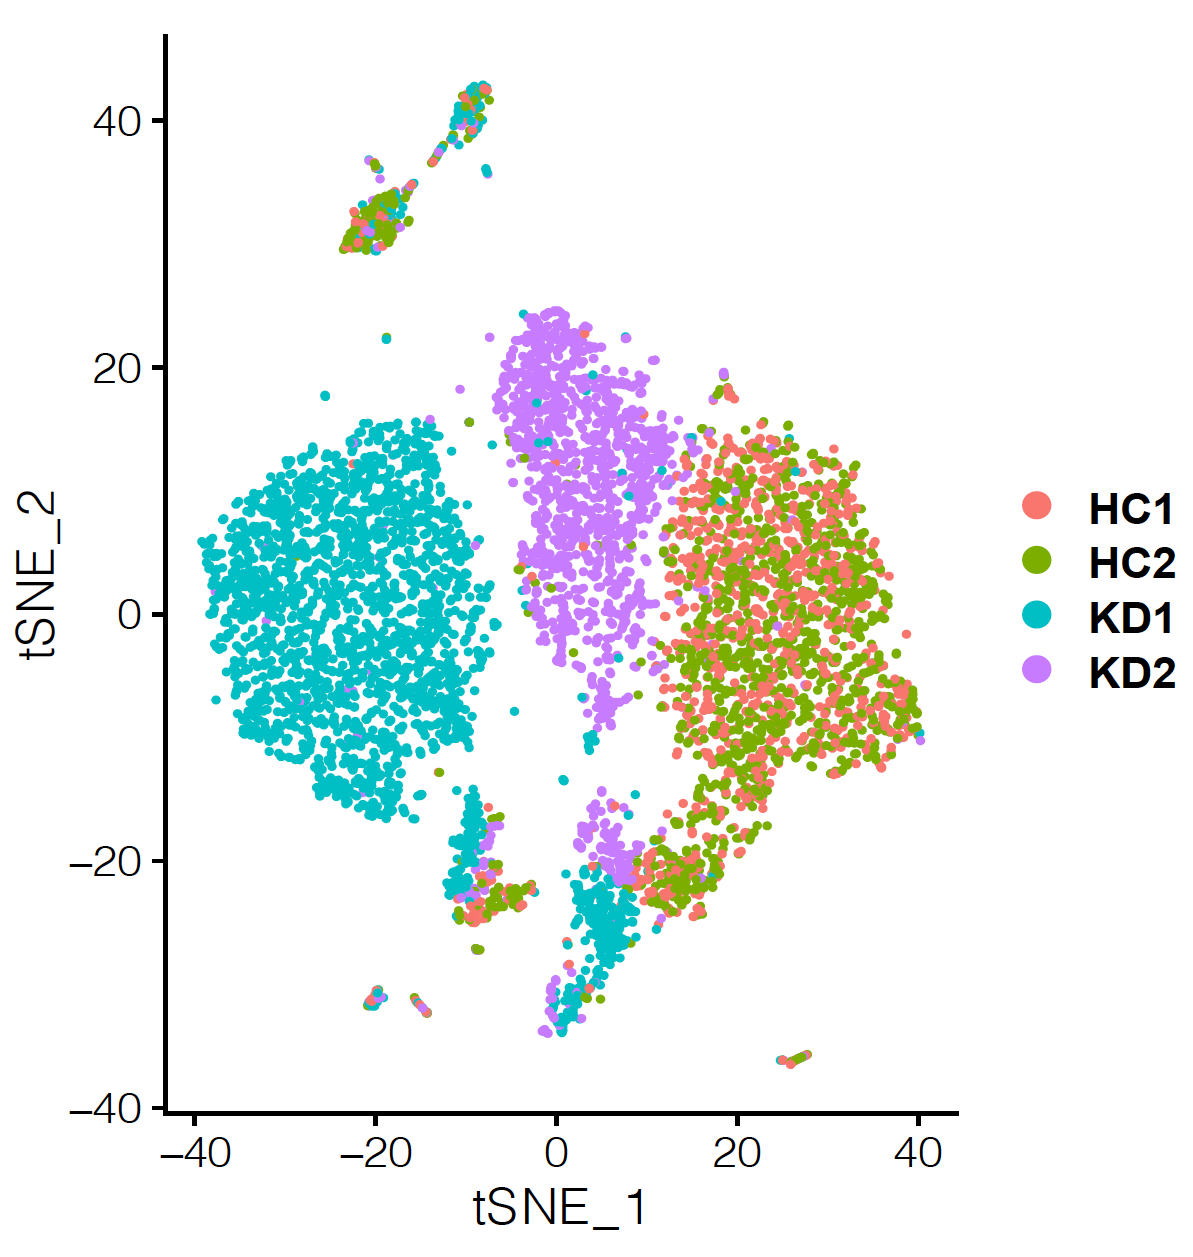
**

Fig. S2 t-SNE plot of the enriched monocytes, clustered in different samples.

**Figure S3**


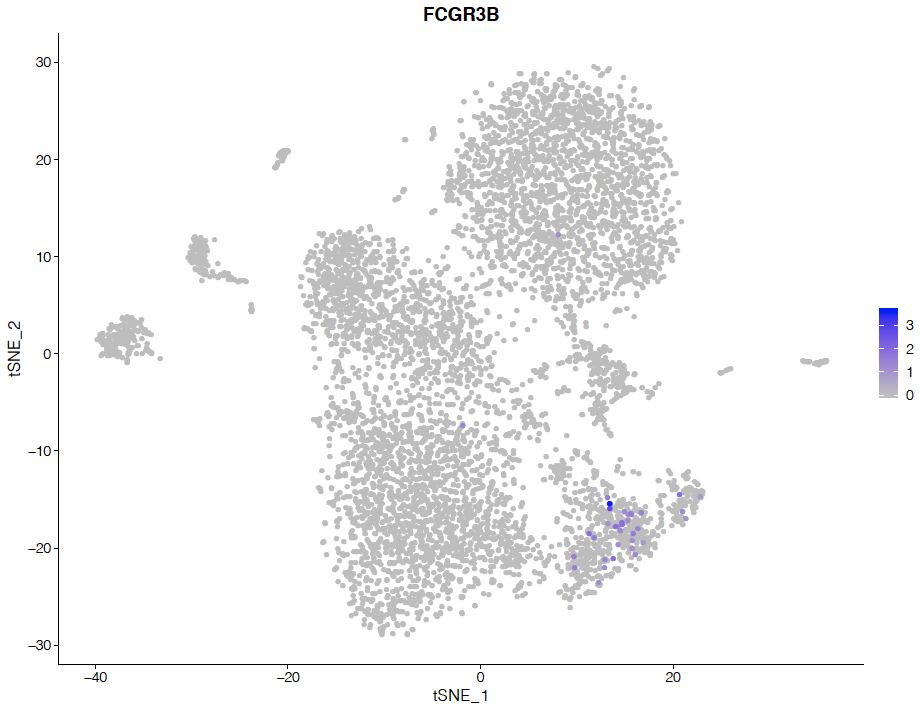


Fig. S3 t-SNE plot of monocyte subsets, showing the cells expressing FCGR3B.

**Figure S4**

**
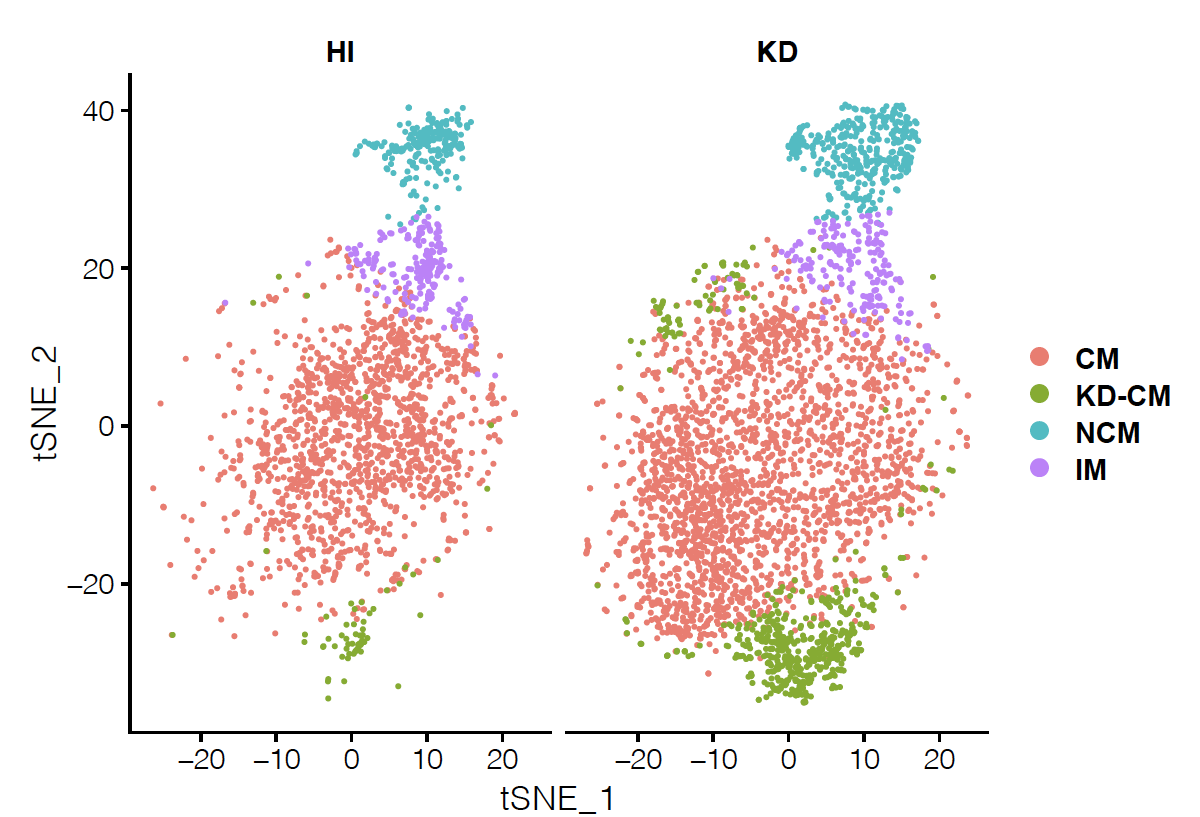
**

Fig. S4 t-SNE plot of monocyte subsets distributed in healthy infants and KD patients respectively. CM, classical monocytes. IM, intermediate monocytes. NCM, non-classical monocytes. KD-CM, CM of KD patients.

**Supplementary Table 1. Characteristics of healthy and KD infants used for scRNA-seq.**

|  |  | **Sex** | **Clinical findings** | **Laboratory findings** |
| --- | --- | --- | --- | --- |
| Healthy infants (HI) | HI1 | Female | N/A | N/A |
| HI2 | male | N/A | N/A |
| KD patients (KD) | KD1 | male | Fever for 5 days;  Erythema of lips, strawberry tongue;  Bilateral bulbar conjunctival injection without exudate;  Erythema and edema of the hands and feet;  Cervical lymphadenopathy (1.3 cm diameter); | White blood cell count [WBC]: 13.89X109;  Lymphocyte ratio: 51.8%;  C-reactive protein [CRP]: 11.21mg/L;  Erythrocyte  sedimentation rate [ESR]: 44mm/h;  IL-6: 504.4pg/ml;  IL-10: 26.4pg/ml; |
| KD2 | Female | Fever for 5 days;  Erythema of lips, strawberry tongue;  Bilateral bulbar conjunctival injection without exudate;  Erythema and edema of the hands and feet;  Tricuspid regurgitation | White blood cell count [WBC]: 12.75X109;  Lymphocyte ratio: 56.1%;  C-reactive protein [CRP]: 90.4mg/L;  Erythrocyte  Sedimentation rate [ESR]: 39mm/h;  IL-6: N/A;  IL-10: N/A; |

**Supplementary Table 2. Differentially expressed genes of KD-CM and CM.**

| **Genes** | **Avg logFC1** | **p val2** | **Regulation3** |
| --- | --- | --- | --- |
| P2RY13 | 0.34156483 | 0.006862439 | up-regulated |
| POU2F2 | 0.33559656 | 0.001741756 | up-regulated |
| FGL2 | 0.25746112 | 0.000560201 | up-regulated |
| MPHOSPH8 | 0.41818538 | 7.74E-05 | up-regulated |
| GOLGA4 | 0.25223955 | 3.80E-06 | up-regulated |
| NKTR | 0.30119438 | 3.77E-06 | up-regulated |
| TFEC | 0.28649529 | 4.05E-07 | up-regulated |
| SELL | 0.28482126 | 1.28E-07 | up-regulated |
| LUC7L3 | 0.29213709 | 8.55E-08 | up-regulated |
| MT.TN | 0.67068785 | 9.17E-09 | up-regulated |
| KB.1639H6.7 | 0.26605364 | 3.98E-09 | up-regulated |
| AC026166.2 | 0.32718837 | 6.07E-14 | up-regulated |
| RP11.39K24.12 | 0.30632524 | 1.21E-15 | up-regulated |
| MALAT1 | 0.46859933 | 8.24E-33 | up-regulated |
| RP11.666G4.1 | 0.30429935 | 1.32E-84 | up-regulated |
| PTX3 | 0.03686496 | -0.289676607 | down-regulated |
| C12orf57 | 0.0297554 | -0.342351881 | down-regulated |
| TMEM107 | 0.01301121 | -0.360709829 | down-regulated |
| PHLDA1 | 8.16E-05 | -0.306552237 | down-regulated |
| PLIN2 | 1.37E-06 | -0.255817679 | down-regulated |
| SNAI1 | 7.03E-09 | -0.361386775 | down-regulated |
| RNU1.60P | 5.11E-09 | -0.383746605 | down-regulated |
| HCAR2 | 2.45E-11 | -0.43669036 | down-regulated |
| ADRB2 | 2.50E-13 | -0.306555277 | down-regulated |
| DUSP2 | 4.40E-14 | -0.582977336 | down-regulated |
| CCL4 | 5.95E-15 | -0.70835353 | down-regulated |
| PPIF | 5.20E-15 | -0.32519229 | down-regulated |
| EREG | 1.36E-15 | -0.676827629 | down-regulated |
| G0S2 | 1.35E-15 | -0.547758287 | down-regulated |
| ZBTB43 | 5.01E-16 | -0.284678166 | down-regulated |
| CDKN1A | 4.15E-16 | -0.40877931 | down-regulated |
| OSM | 5.06E-17 | -0.323339489 | down-regulated |
| PDE4B | 3.13E-17 | -0.366266041 | down-regulated |
| CXCL3 | 1.29E-17 | -0.697544259 | down-regulated |
| BCL2A1 | 1.90E-19 | -0.253456765 | down-regulated |
| GPR183 | 1.29E-20 | -0.360304889 | down-regulated |
| CHMP1B | 1.40E-21 | -0.29620645 | down-regulated |
| CITED2 | 6.21E-23 | -0.356269377 | down-regulated |
| C5AR1 | 4.86E-23 | -0.25296974 | down-regulated |
| SGK1 | 4.26E-23 | -0.419805593 | down-regulated |
| TRIB1 | 1.29E-23 | -0.273361677 | down-regulated |
| TIPARP | 1.59E-25 | -0.337728153 | down-regulated |
| RGCC | 2.23E-26 | -0.736153682 | down-regulated |
| PTGS2 | 4.47E-30 | -0.654013726 | down-regulated |
| ADM | 3.53E-30 | -0.48032013 | down-regulated |
| CTD.3014M21.1 | 2.18E-33 | -0.457379255 | down-regulated |
| OTUD1 | 2.15E-35 | -0.603983686 | down-regulated |
| DUSP6 | 1.78E-35 | -0.463080486 | down-regulated |
| KLF4 | 1.12E-35 | -0.259634919 | down-regulated |
| NR4A2 | 2.57E-36 | -0.426978893 | down-regulated |
| CD83 | 1.26E-36 | -0.596339149 | down-regulated |
| SERPINB2 | 5.99E-37 | -0.510656963 | down-regulated |
| ANXA1 | 4.83E-37 | -0.319591429 | down-regulated |
| GPR109B | 2.01E-37 | -0.626430389 | down-regulated |
| IER2 | 4.48E-38 | -0.419236218 | down-regulated |
| ATF3 | 3.70E-38 | -0.635057735 | down-regulated |
| PHACTR1 | 1.08E-41 | -0.348874333 | down-regulated |
| FTH1 | 6.36E-42 | -0.265664207 | down-regulated |
| JUNB | 8.29E-44 | -0.32739786 | down-regulated |
| BTG2 | 5.54E-44 | -0.424084121 | down-regulated |
| PTGER2 | 1.47E-44 | -0.272070093 | down-regulated |
| PNRC1 | 6.47E-47 | -0.332575922 | down-regulated |
| MYADM | 4.73E-52 | -0.438014923 | down-regulated |
| VIM | 1.19E-57 | -0.32687744 | down-regulated |
| CXCL2 | 3.71E-63 | -1.081395462 | down-regulated |
| CCL3 | 4.65E-67 | -0.817574099 | down-regulated |
| RP11.591N1.1 | 1.82E-67 | -0.597860519 | down-regulated |
| KLF6 | 5.74E-69 | -0.433929622 | down-regulated |
| NFKBIZ | 3.01E-75 | -0.5838512 | down-regulated |
| FOS | 4.49E-77 | -0.336990177 | down-regulated |
| TNFAIP3 | 2.37E-79 | -0.540833785 | down-regulated |
| ZFP36 | 1.18E-89 | -0.446683089 | down-regulated |
| EGR1 | 3.52E-91 | -1.096487645 | down-regulated |
| JUN | 1.49E-109 | -0.809744643 | down-regulated |
| IL1B | 3.70E-125 | -1.161693446 | down-regulated |
| FOSB | 4.23E-156 | -0.753624992 | down-regulated |
| IER3 | 1.47E-156 | -1.040281035 | down-regulated |
| NFKBIA | 2.02E-163 | -0.747897823 | down-regulated |
| CXCL8 | 1.00E-175 | -1.081851559 | down-regulated |

Footnotes:

1 - Value refers to average differential expression between KD-CM and CM (log fold change)

2 - Value refers to discriminatory power

3 - Regulation refers to KD-CM vs CM
